# Supplementary material
Source: PubMed Central journal article supplement (PMC4827613)
Supplement: NIHMS773327-supplement-Supplemental_Figures.pdf [file NIHMS773327-supplement-Supplemental_Figures.pdf]

Supplementary Fig. 1

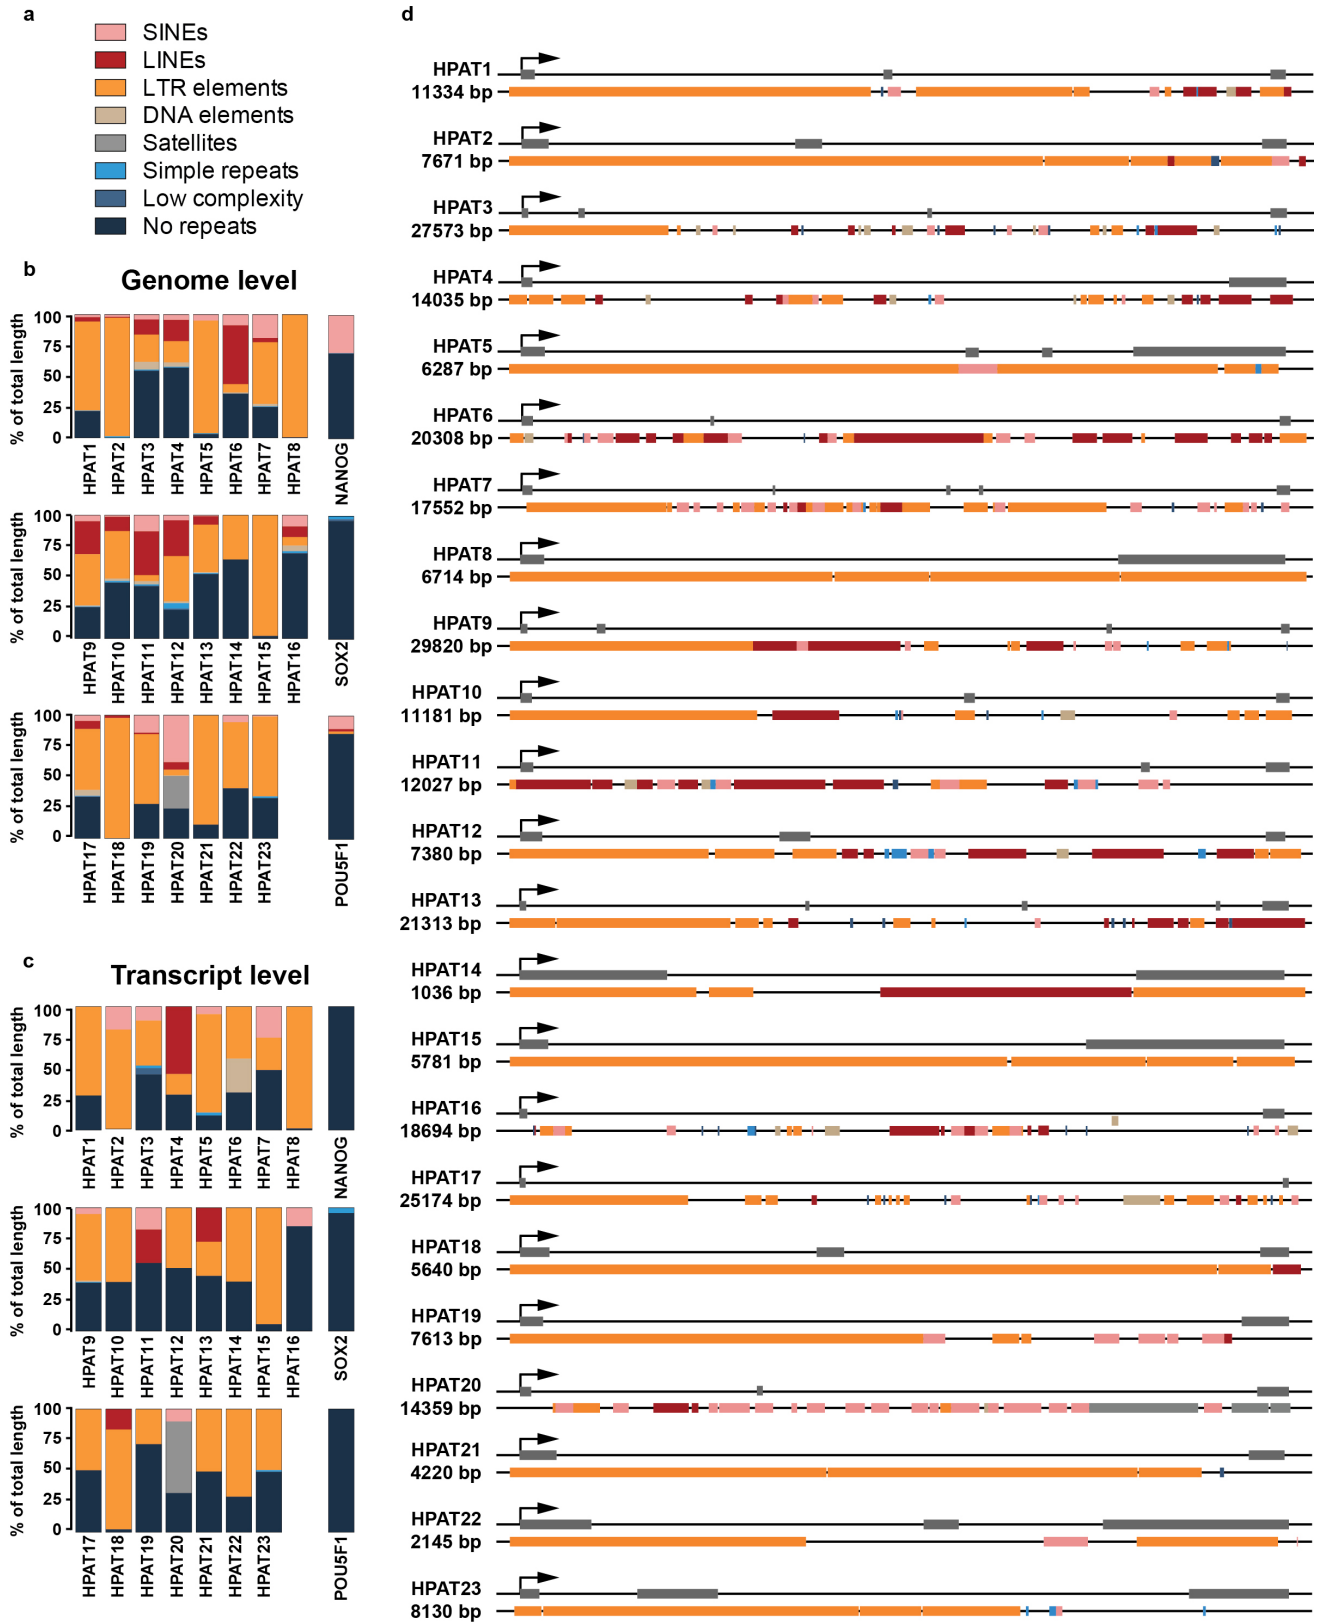

## Supplementary Figure 1

### All 23 HPATs are significantly enriched for TEs.

(a) The different classes of TEs are color-coded; corresponding colors are used in **b–e**. (**b,c**) Coverage of different TE classes on the genome (exons + introns) and transcript (only exons) levels. The percentage of total length for each TE is represented for all 23 HPATs. Three control genes are included. (**d**) The 23 HPATs with embedded TEs and genomic length. Displayed are the most highly expressed isoforms for each HPAT gene. Genomic DNA is represented as a black line, and exons are represented by gray boxes. TEs are represented by the colored boxes underneath. Each exon is exonized with TEs (exons overlap TEs). The length of each genomic locus is not to scale.

## Supplementary Fig. 2

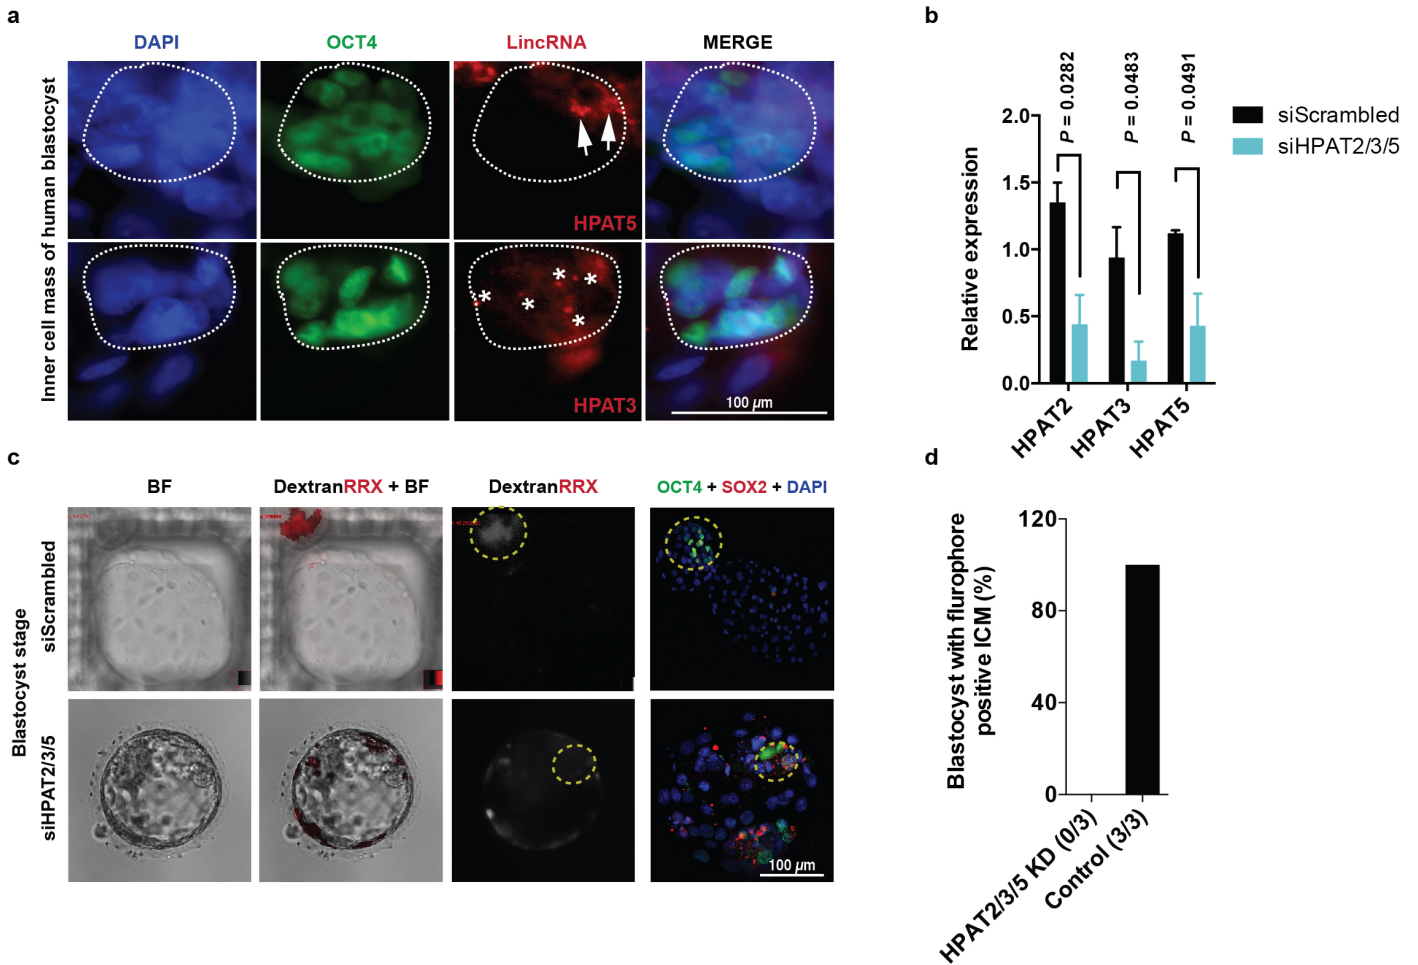

### Supplementary Figure 2

#### Molecular and functional analysis of *HPAT2*, *HPAT3* and *HPAT5* during preimplantation development.

(a) Magnified view of the ICM in human blastocyst demonstrates a specific staining pattern in the ICM of human blastocysts. Stars depict *HPAT3* signal. Arrows depict *HPAT5* signal. (b) *HPAT2*, *HPAT3* and *HPAT5* are significantly downregulated in human blastocysts injected with siRNAs compared to siScrambled controls ( $n = 3$  blastocysts; data are shown with s.e.m.). (c) Blastomeres with knockdown of *HPAT2*, *HPAT3* and *HPAT5* during human embryo development did not contribute to ICM. The presence of ICM was validated with OCT4 and SOX2 staining. The ICM is highlighted by a yellow dashed circle. (d) Fluorescence-positive ICM in blastocysts *with* HPAT knockdown and control blastocysts.

### Supplementary Fig. 3

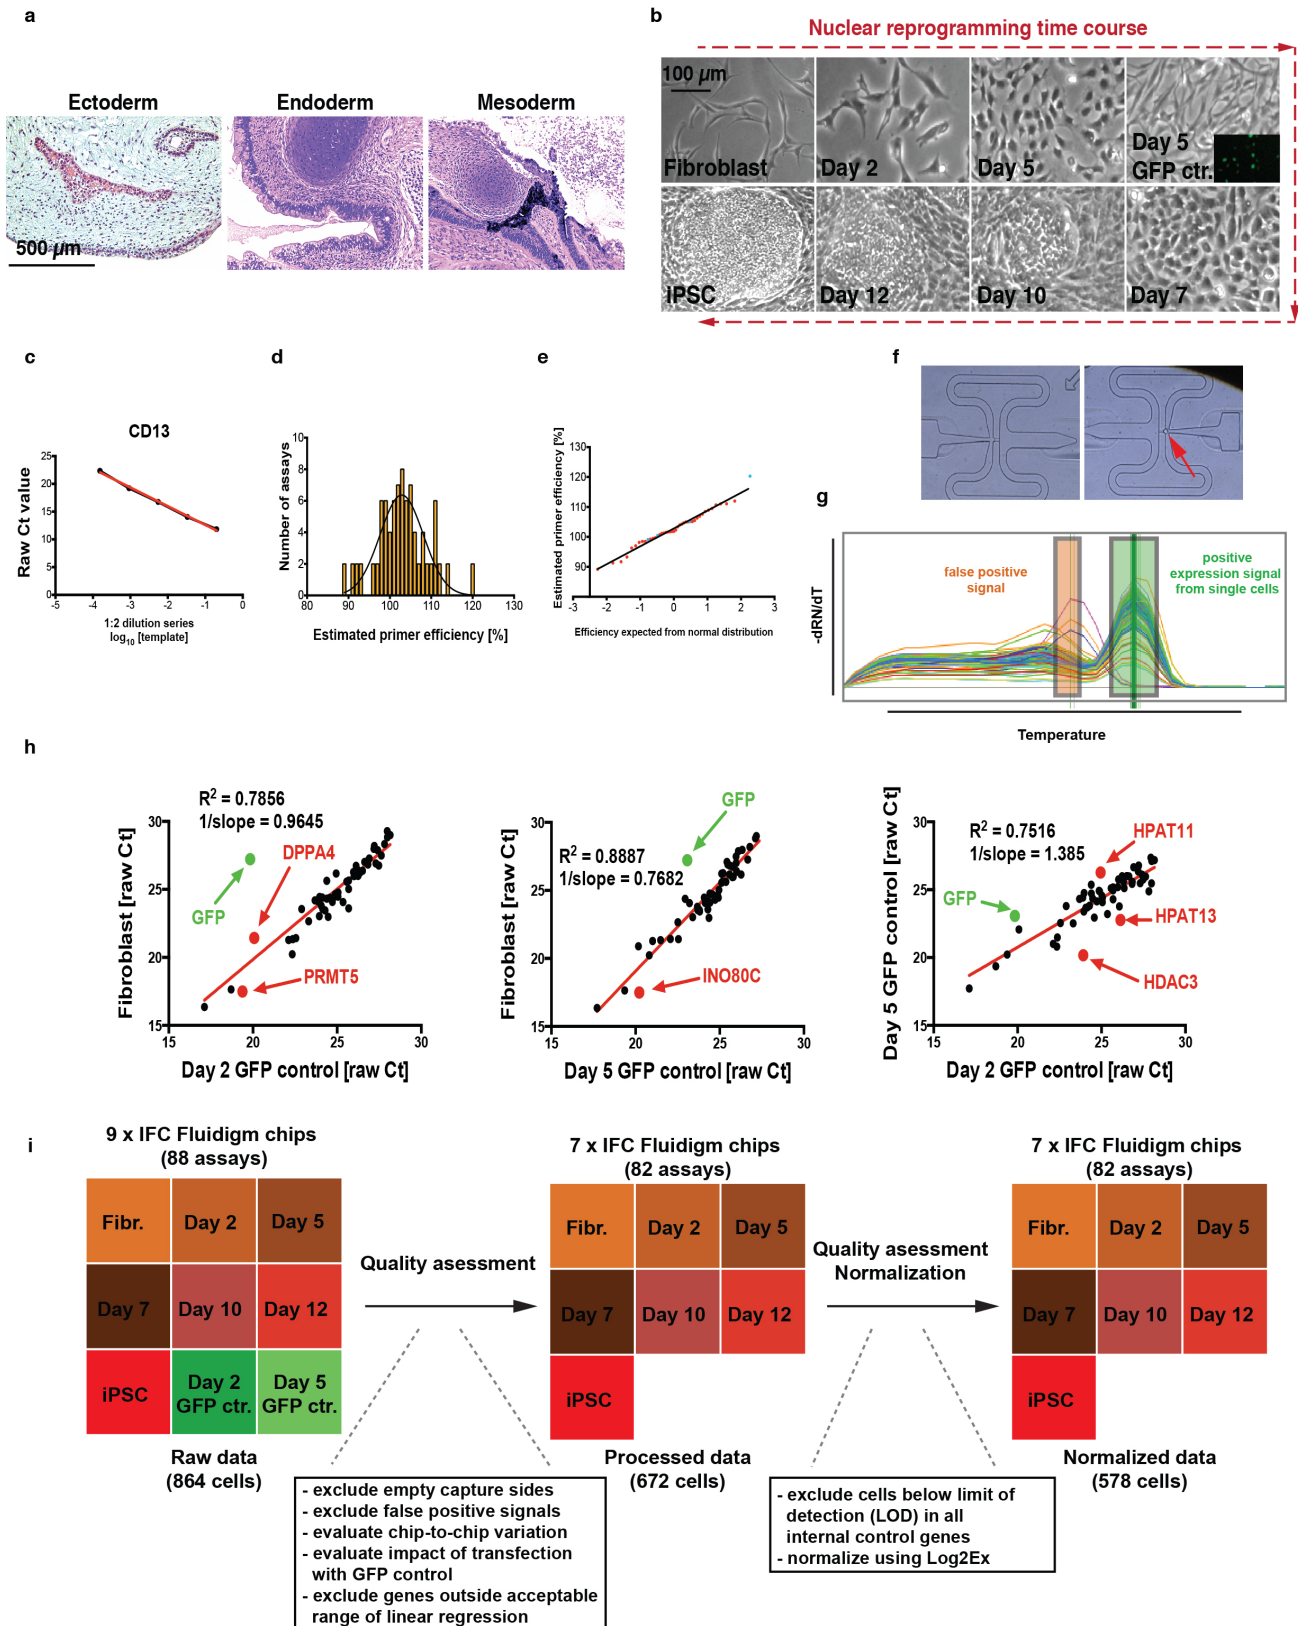

### Supplementary Figure 3

#### Primer validation and quality control of single-cell gene expression data.

(a) Histological sections stained with hematoxylin and eosin from teratomas derived from established iPSCs (iPSCs that resulted from derivation from BJ fibroblasts are termed fully established iPSCs and were used as the last time point for collection (see **b**). (b) Tracking of morphological changes of BJ fibroblasts during mRNA reprogramming with the Yamanaka factors. Depicted are the days at which cells were collected. Fibroblasts transfected with GFP only for five consecutive days are shown as well with GFP signal (images are representative). (c) Representative example of a dilution series for all 96 assays.  $C_t$  values were plotted as a function of the dilution factors (1:2) on a log scale. Linear regression analysis is depicted by the red line. Eight assays with  $R^2 < 0.97$  were excluded, thus leaving 88 assays. (d) Distribution histogram of calculated primer efficiencies for 88 DELTAgene assays estimated from the slopes of standard curve plots. The average efficiency is 1.02 with s.d. = 0.06. (e) Quantile-quantile plot with experimentally estimated efficiencies ( $y$  axis) and the values expected for a normal distribution with mean efficiency = 1.02 and s.d. = 0.06 ( $x$  axis). The black line indicates the values expected for a normal distribution ( $y = x$ ). Efficiency values that were derived from plots with three points in the standard curve are depicted in blue. Values derived from plots with  $>3$  points in the standard curve are depicted in red. (f) Microscopic view of two capture sides on the C1 Single-Cell Auto Prep System microfluidic chip. The left capture side has no cell, and the right capture side has one captured cell (red arrow). (g) Representative example of primer specificity evaluation using melting curve analysis (here with *HPAT2*). The graph shows the relative change in fluorescence signal (EvaGreen) over the temperature range for all 96 cells on a single array. The area in red depicts false positive signals with incorrect melting curve temperatures (determined with bulk RNA and based on the melting curve temperature provided by Fluidigm). The area in green depicts the correct melting curves. Data outside the correct melting curve were set to 0. (h) Correlation analysis of mean  $C_t$  values generated 96 cells of three dynamic IFC arrays (single cells of (i) BJ fibroblasts, (ii) BJ fibroblasts transfected with mRNA encoding GFP for 2 d, (iii) BJ fibroblasts transfected with mRNA encoding GFP for 5 d). Genes that were detected in at least 20% of the 96 cells for each dynamic IFC array are considered. Shown are all three comparisons. Outliers are shown in green (GFP) and red. The assays in red (total of six) were excluded from subsequent analysis due to a non-correlative pattern among the arrays, leaving the 82 assays that are listed in **Supplementary Table 2. i**, Schematic overview of the quality assessment before normalization of single-cell gene expression. Nine dynamic IFC arrays (96.96 Fluidigm chips) were used for gene expression analysis. Two GFP control chips along with one fibroblast chip were used for correlation analysis (**h**) followed by initial quality assessment. Processed chips were used for a second round of quality assessment, resulting in 578 normalized single cells.

Supplementary Fig. 4

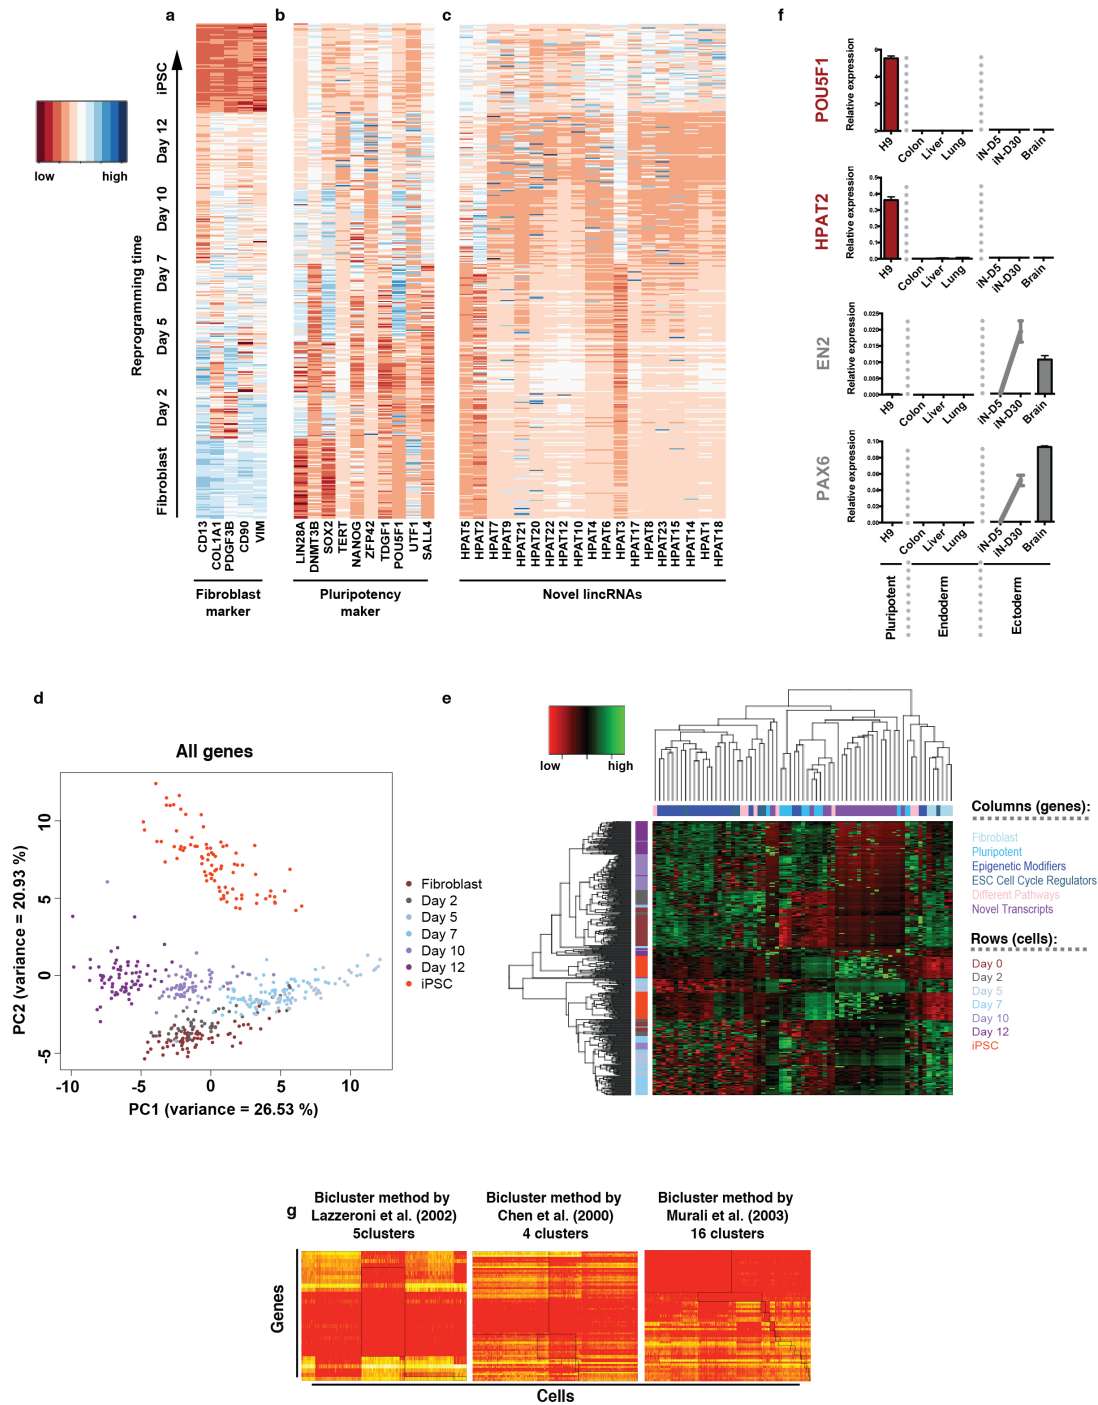

Supplementary Figure 4

Single-cell gene expression analysis during nuclear reprogramming and reactivation of HPAT expression during *in vitro* transdifferentiation from fibroblasts into neurons.

(a–c) Heat map plot of single-cell gene expression of different markers during nuclear reprogramming. Single cells are in rows. Genes are in columns. Fibroblast markers decrease over time, and pluripotency-specific markers, including selected HPATs, increase over

time as cell progress toward iPSCs ( $n = 87, 85, 72, 70, 86, 83$  and  $95$  for fibroblasts, day 2, day 5, day 7, day 10, day 12 and iPSCs, respectively). Normalization was performed accordingly (the **Supplementary Note** provides details). White color indicates no expression. **(d)** PCA of 578 single cells collected at different time points during nuclear reprogramming. **(e)** Heat map and unsupervised clustering for 578 single-cell gene expression values resulted in clustering of novel genes implicating a similar biological context during reprogramming. Samples are color-coded according to the specific gene groups (horizontal) and the day at which single cells were collected (vertical). **(f)** The pluripotency marker *POU5F1* (red) and *HPAT2* (red; representative of all HPATs in this study) were exclusively expressed in H9 cells (hESCs) but not in (i) cDNA from colon, liver and lung (endoderm) and (ii) during neuronal transdifferentiation from fibroblasts (gray; samples collected at day 5 and day 30 are labeled iN-D5 and iN-D30, respectively) or cDNA from brain) (all ectoderm). *EN2* and *PAX6*, included as ectoderm control markers, were detected during neuron differentiation and in brain samples ( $n = 3$ ; data shown with s.e.m.). **(g)** Heat map of bicluster analysis illustrating a different bicluster within each plot (**Supplementary Table 3**). Three different algorithms for bicluster calculation were applied, resulting in the identification of five clusters, four clusters and 16 clusters.

Supplementary Fig. 5

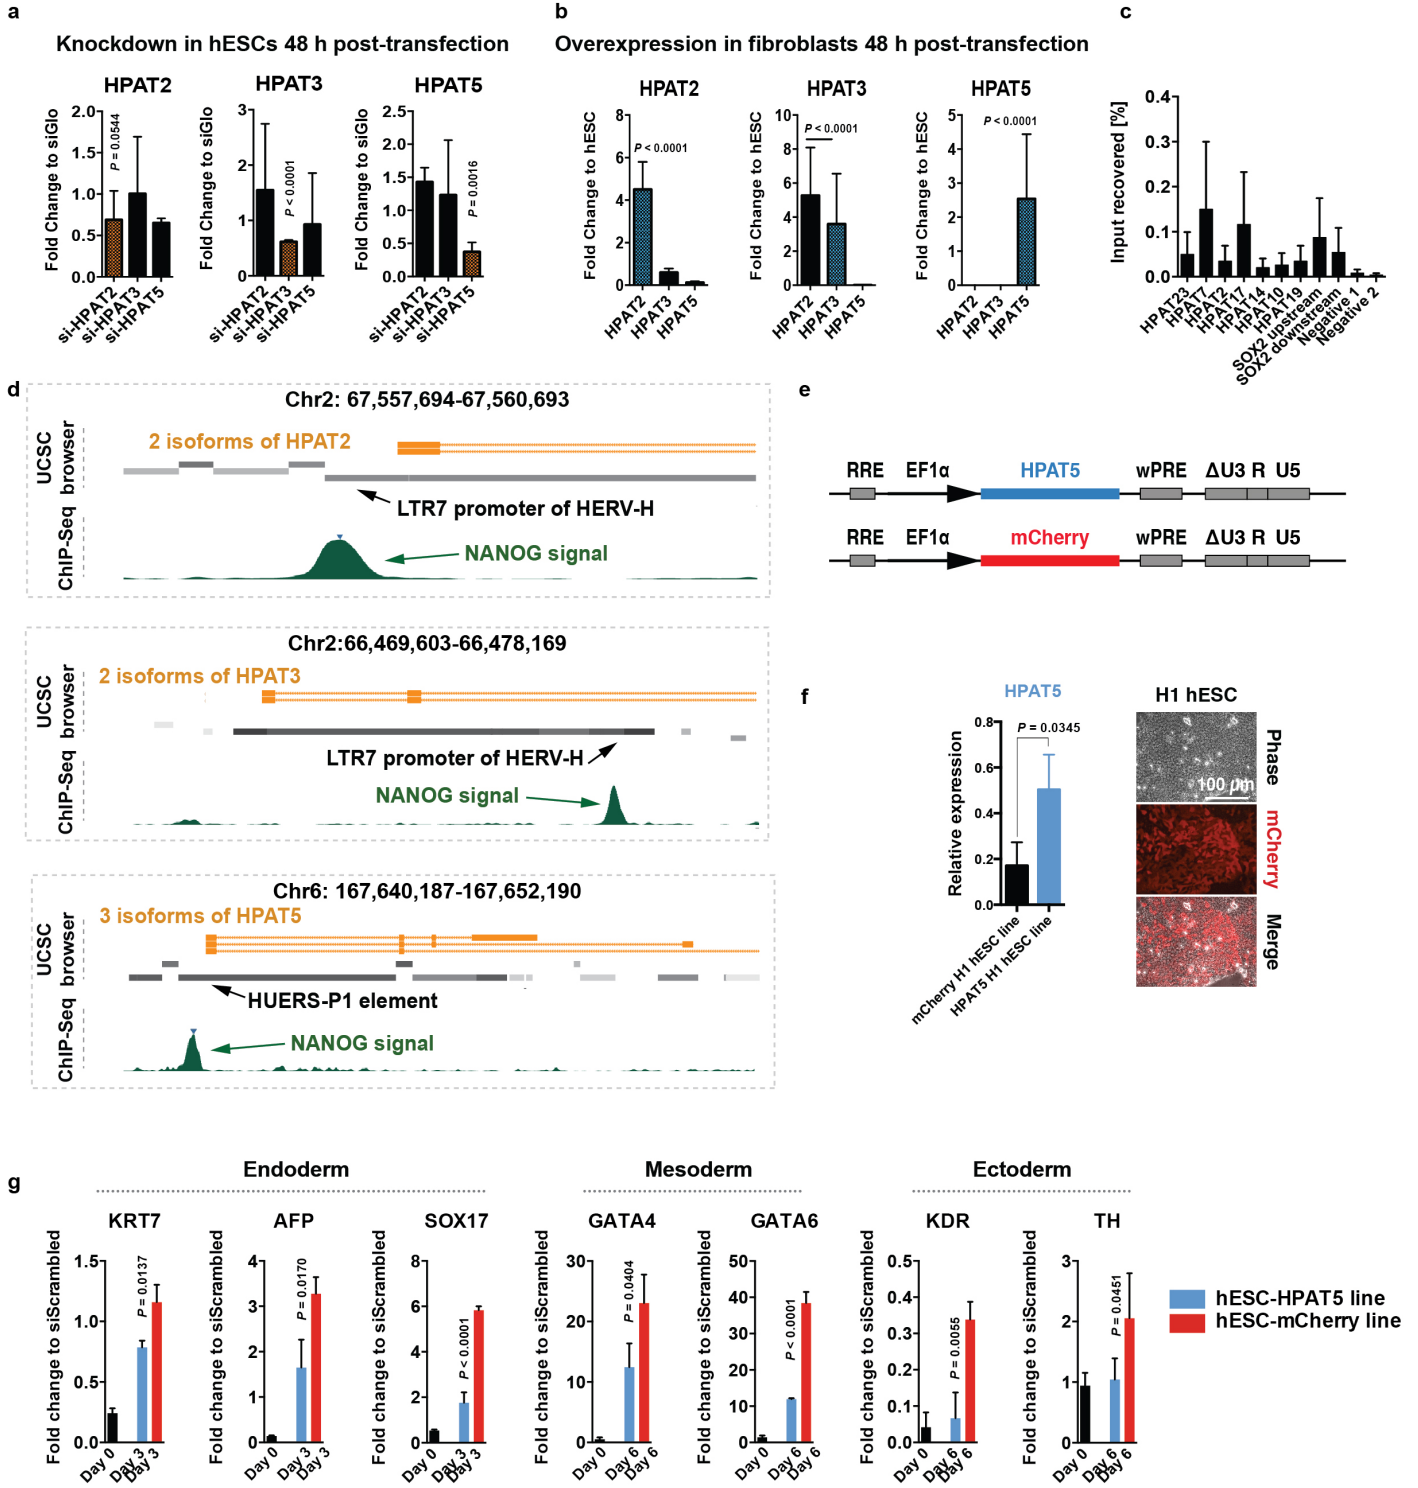

Supplementary Figure 5



**Overexpression and silencing constructs for *HPAT2*, *HPAT3* and *HPAT5*, NANOG ChIP-seq and regulation of *HPAT5* during hESC differentiation.**

(a) Validation of siRNAs targeting *HPAT2*, *HPAT3* and *HPAT5*, respectively, in hESCs. Gene expression and *P* values were measured relative to siGlo control 48 h after transfection ( $n = 9$ ). Orange color depicts expected gene downregulation. (b) Validation of the overexpression vectors. BJ fibroblasts were transfected with *HPAT2*, *HPAT3* and *HPAT5*. Gene expression and *P* values were measured 48 h after transfection relative to those in GFP-transfected fibroblasts ( $n = 9$ ). Blue color depicts expected gene upregulation. (c) ChIP-qPCR analysis in H9 cells (hESCs) using NANOG. Signals were quantified using primer sets specific to a subset of HPATs or two 'negative' intergenic, non-repetitive regions. Two enhancers around *SOX2* are included as positive controls ( $n = 3$ ; data are shown with s.e.m.). (d) Three snapshots of the UCSC browser (genome location indicated) aligned with the NANOG-binding region for *HPAT2*, *HPAT3* and *HPAT5* from ChIP-seq analysis. (e,f) Overexpression constructs and validation of the *HPAT5*-OE and mCherry-OE lines. *HPAT5* was significantly upregulated in hESC-OE cells compared to control cells. mCherry protein expression was also confirmed.  $n = 3$ ; data are shown with s.e.m. (g) Increase in differentiation markers representing all three germ layers significantly repressed in *HPAT5*-OE cells. *P* values are calculated for comparison of the mCherry and *HPAT5*-OE lines on the same days.

Supplementary Fig. 6

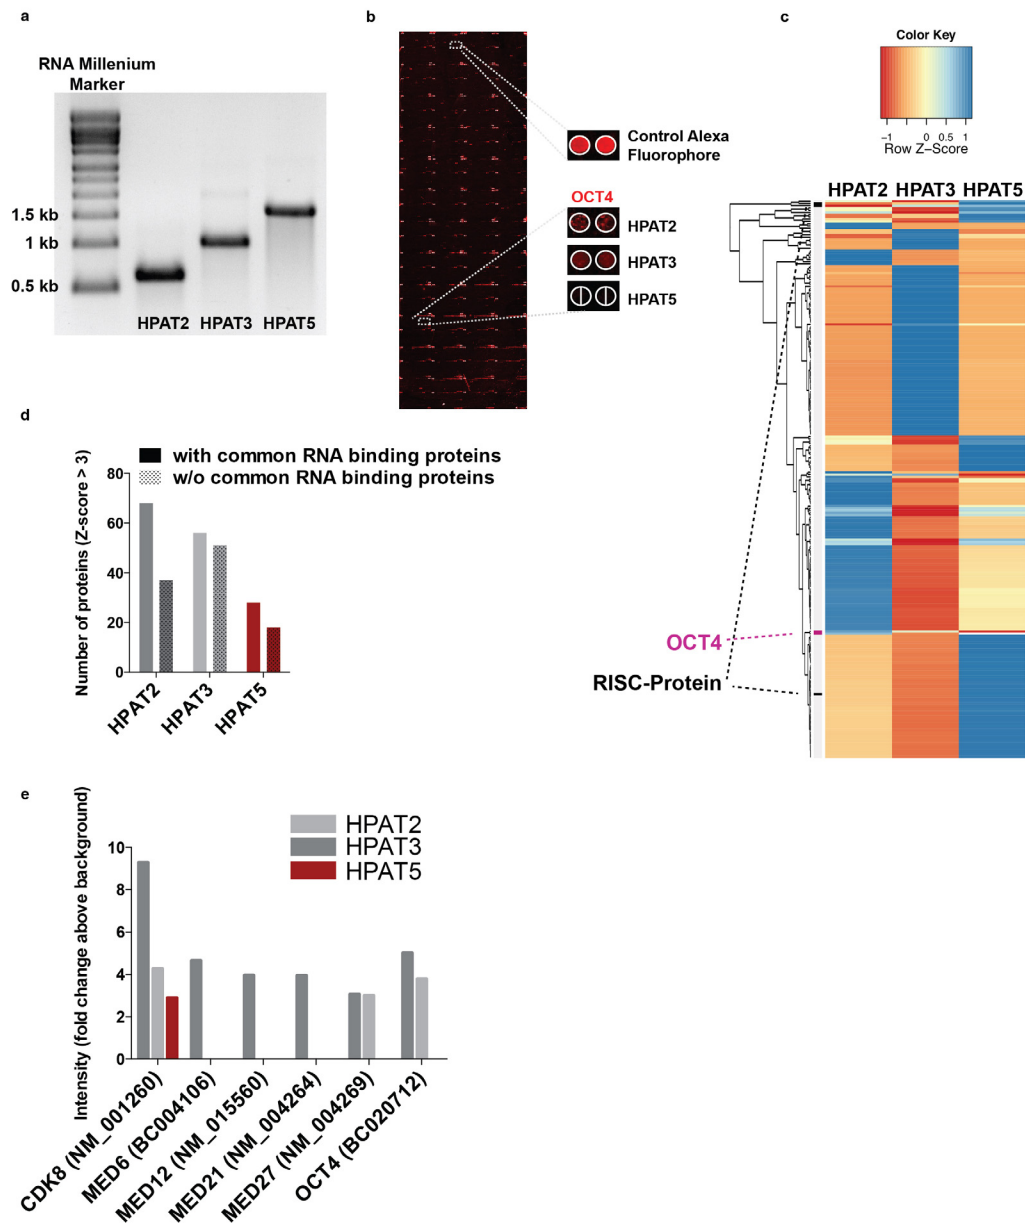

Supplementary Figure 6

**Protein microarray with *HPAT2*, *HPAT3* and *HPAT5*.**

(a) Formaldehyde agarose RNA gel of the Cy5-labeled lincRNAs before hybridization to the protein array. (b) Representative image of a ProtoArray and fluorescence intensity for *HPAT2* and *HPAT3* (positive) and *HPAT5* (negative) on OCT4 protein in duplicate. (c) Heat map of *HPAT2*-, *HPAT3*- and *HPAT5*-binding proteins with RISC proteins and OCT4 highlighted (z score > 2.5). (d) Total number of candidate proteins identified with the three HPATs (with and without common RNA-binding proteins). (e) Validation of the findings by Lu *et al.* that HERV-H-derived lincRNAs (*HPAT2* and *HPAT3*) bind to specific OCT4, coactivators and mediators.

## Supplementary Fig. 7

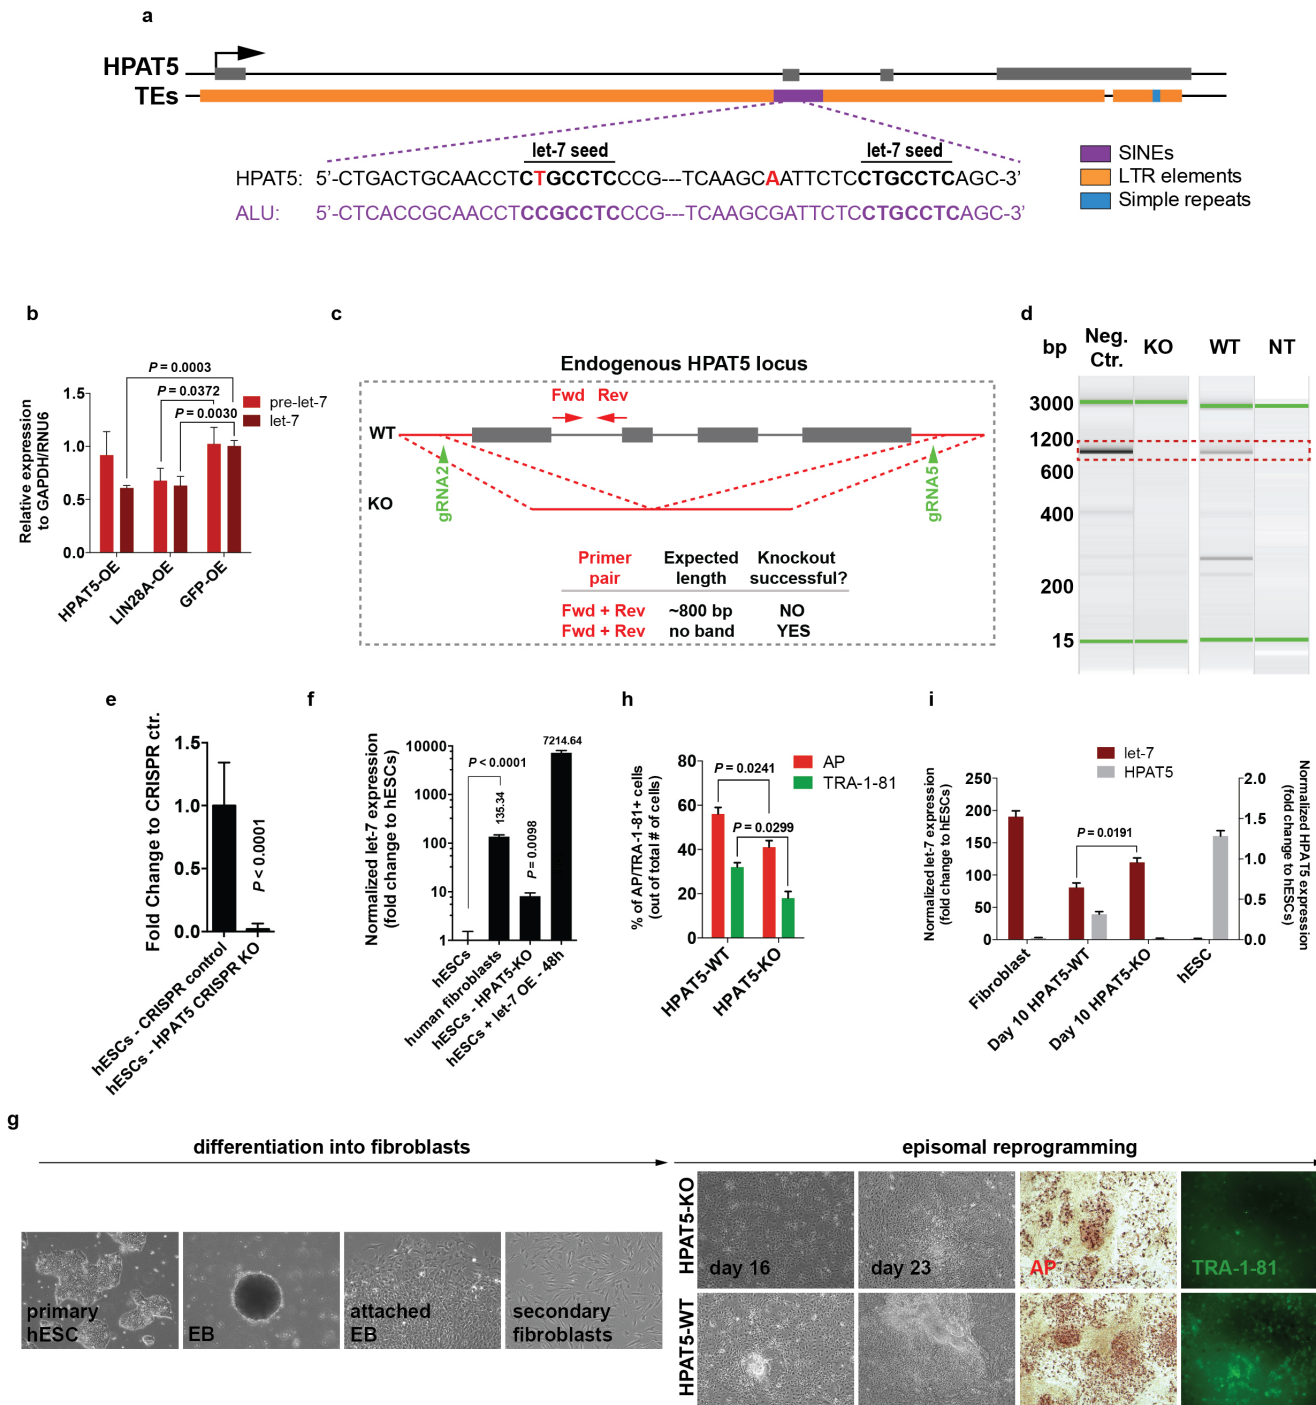

### Supplementary Figure 7

#### Loss-of-function analyses in hESCs.

(a) Predicted let-7 binding sites in *HPAT5* transcript. Shown is *HPAT5* with embedded TEs along the genomic length (black line). Exons are shown as gray boxes. TEs are shown as colored boxes underneath. let-7 binding sites are within a SINE element (Alu). Bases in red are point mutations and confer *HPAT5* specificity. (b) Gene expression analysis of endogenous pre-let-7 and mature let-7 in

fibroblasts.  $n = 3$ ; data are shown with s.e.m. (c) Schematic overview of the *HPAT5* locus in genomic DNA from subcloned hESCs that were treated with CRISPR pairs 2 and 5 (gRNA2/5). Forward and reverse primers (in red) were designed to amplify a region of genomic DNA that is inside the deleted *HPAT5* locus. (d) Agarose gel illustrating successful derivation of the *HPAT5*-knockout hESC line. Genomic DNA from hESCs (passage 4 after subcloning) did not result in specific amplification. The controls included negative control (treatment only with one CRISPR arm, gRNA2), wild-type hESCs and no-template control (NT). (e) Gene expression analysis of endogenous *HPAT5* in hESCs.  $n = 3$ ; data are shown with s.e.m. (f) Endogenous let-7 levels do not reach the levels in differentiated cells during 48 h of hESC differentiation. Endogenous let-7 levels are significantly increased 48 h after differentiation with bFGF removal (tenfold). The levels of endogenous let-7 are still significantly higher in human fibroblasts (100-fold) compared to differentiated hESCs. *HPAT5* knockout increases endogenous let-7 levels to ones similar to those found in hESCs differentiated for 24 h. Overexpression of let-7 in hESCs results in a -50-fold increase compared to human fibroblasts. let-7 levels were normalized to Hs-RNU6-2.  $n = 3$ ; data are shown with s.e.m. (g) Differentiation of hESCs into secondary fibroblasts followed by episomal reprogramming into iPSCs. (h) Percentage of AP- and TRA-1-81-positive cells in *HPAT5*-WT and *HPAT5*-KO cells 25 d after reprogramming.  $n = 3$ ; data are shown with s.e.m. (i) Endogenous let-7 and *HPAT5* levels during nuclear reprogramming at day 10.  $n = 3$ ; data are shown with s.e.m.

Supplementary Fig. 8

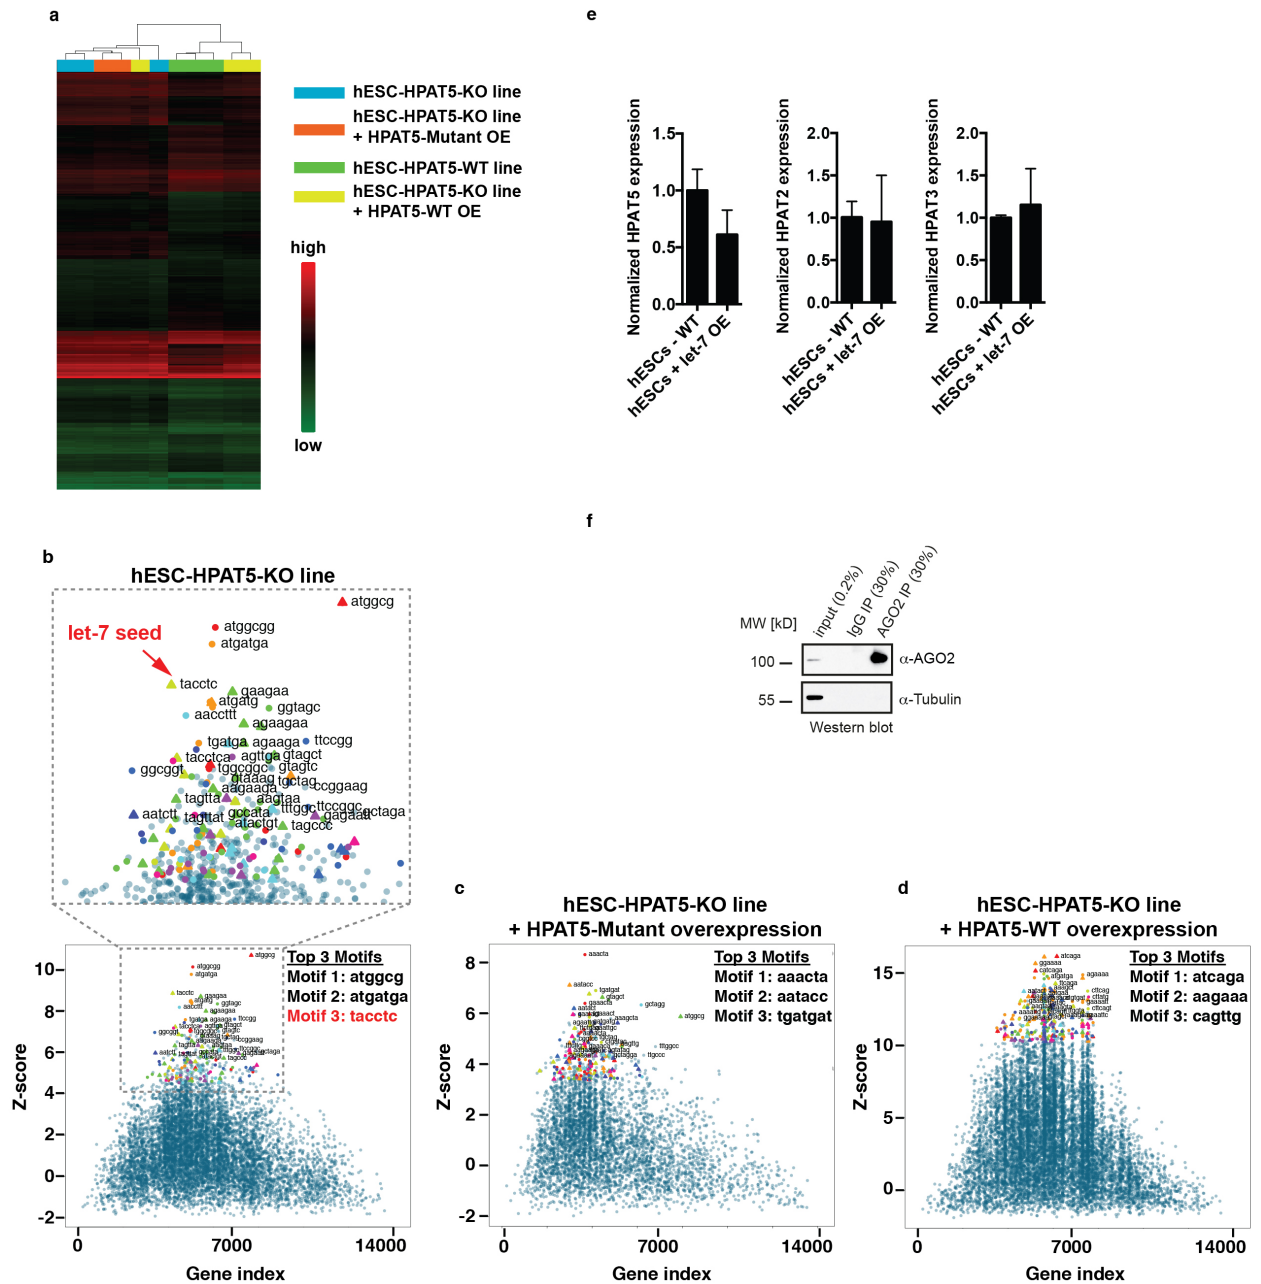

Supplementary Figure 8

**HPAT5 regulates let-7 in hESCs during differentiation.**

(a) Heat map of differentially expressed genes ( $P < 0.05$ ) after let-7 overexpression in four different samples. (b–d) Enrichment of let-7 seed sites in transcripts that were downregulated in hESC-HPAT5-KO cells. Overexpression from HPAT5-WT transcript rescued let-7-mediated differentiation. The Word cluster plot shows sequences in genes ranked by differential expression, after let-7 transfection. Each dot represents a word, summarizing z scores, and enrichment specificity indices of the enrichment profiles of negatively correlated 6- and 7-mer words. Triangles annotate known seed sites of human miRNAs. (i) A zoomed-in view (top) from the cluster plot. (e) Endogenous HPAT2, HPAT3 and HPAT5 expression in hESCs with let-7 overexpressed.  $n = 3$ ; data are shown with s.e.m. (f)

Immunoblot confirming specific AGO2 pulldown. OE, overexpression.  $n = 3$  samples; data are shown with s.e.m.

**The primate-specific noncoding RNA HPAT5 regulates pluripotency during human preimplantation development and nuclear reprogramming**

Jens Durruthy-Durruthy, Vittorio Sebastiano, Mark Wossidlo, Diana Cepeda, Jun Cui, Edward J. Grow, Jonathan Davila, Moritz Mall, Wing Wong, Joanna Wysocka, Kin Fai Au, and Renee A. Reijo Pera

Supplementary Note inventory (as PDF)

The following Supplementary Note is merged in one PDF file:

- 1) Supplementary Tables 1-4
- 2) Supplementary Note
- 3) Supplementary References

Supplementary Tables 1-8

**Supplementary Table 1 - Sequence features of 23 HPATs on a genomic level.**

| HPAT     | LTR/ERV elements [%]          | Fraction of HERV-H elements [%]* | Bases masked [%] | Length of genomic locus of HPAT [bp] |
|----------|-------------------------------|----------------------------------|------------------|--------------------------------------|
| HPAT1    | 72.24                         | 66.02                            | 78.33            | 11334                                |
| HPAT2    | 96.07                         | 100                              | 93.42            | 7671                                 |
| HPAT3    | 22.05                         | 100                              | 45.71            | 27573                                |
| HPAT4    | 17.21                         | 100                              | 43.14            | 14035                                |
| HPAT5†   | 91.36                         | 0                                | 97.01            | 6287                                 |
| HPAT6    | 6.70                          | 100                              | 71.55            | 20308                                |
| HPAT7    | 50.16                         | 55.09                            | 75.12            | 17553                                |
| HPAT8    | 99.64                         | 92.44                            | 99.64            | 6714                                 |
| HPAT9    | 41.41                         | 100                              | 74.57            | 29820                                |
| HPAT10   | 38.51                         | 100                              | 54.74            | 11181                                |
| HPAT11   | 4.93                          | 100                              | 57.75            | 12027                                |
| HPAT12   | 36.73                         | 100                              | 76.90            | 7380                                 |
| HPAT13   | 37.69                         | 92.83                            | 52.01            | 21313                                |
| HPAT14   | 36.00                         | 63.64                            | 36.00            | 1036                                 |
| HPAT15   | 97.94                         | 100                              | 97.94            | 5781                                 |
| HPAT16   | 6.88                          | 0                                | 31.38            | 18694                                |
| HPAT17   | 49.38                         | 51.71                            | 66.23            | 25174                                |
| HPAT18   | 97.62                         | 100                              | 99.89            | 5640                                 |
| HPAT19   | 56.60                         | 100                              | 72.02            | 7613                                 |
| HPAT20   | 4.63                          | 0                                | 75.79            | 14359                                |
| HPAT21   | 88.84                         | 100                              | 88.84            | 4220                                 |
| HPAT22   | 53.66                         | 0                                | 59.39            | 2145                                 |
| HPAT23   | 65.84                         | 100                              | 67.34            | 8130                                 |
| Controls | Found ERV class 1 repeats [%] | Fraction of HERV-H elements [%]* | Bases masked [%] | Length of genomic locus of HPAT [bp] |
| NANOG    | 0.00                          | 0                                | 30.91            | 6661                                 |
| POU5F1   | 1.56                          | 0                                | 29.82            | 6337                                 |
| SOX2     | 0.00                          | 0                                | 4.06             | 2512                                 |

**Supplementary Table 1. Sequence features of 23 HPATs on a genomic level.** All HPATs share repeats from the LTR/ERV class with the majority being HERV-H elements. Control genes are included for comparison. \* Fraction extracted from column 2. † Contained large fraction of HUERS-P1 elements. Analysis was performed with RepeatMasker ([www.repeatmasker.org](http://www.repeatmasker.org)).



**Supplementary Table 2 – Assays that passed quality tests and used for single-cell gene expression analysis; Primer sequences used in this study.**

| Gene                                                                                | Category                               | Gene                                                                                   | Category                            | Gene                                                                                                                                                                                       | Category                | Gene                                                                                                                                                                                                  | Category                           |
|-------------------------------------------------------------------------------------|----------------------------------------|----------------------------------------------------------------------------------------|-------------------------------------|--------------------------------------------------------------------------------------------------------------------------------------------------------------------------------------------|-------------------------|-------------------------------------------------------------------------------------------------------------------------------------------------------------------------------------------------------|------------------------------------|
| RPLP0<br>GAPDH<br>HSP90AB1<br>ACTB<br>HPRT1<br>POU5F1*<br>SOX2*<br>LIN28A*<br>EGFP* | Internal/<br>External<br>Control       | LIN28A<br>DNMT3B<br>SOX2<br>TERT<br>NANOG<br>ZFP42<br>TDGF1<br>POU5F1<br>UTF1<br>SALL4 | Pluripotency<br>Marker <sup>†</sup> | BPTF<br>CBX7<br>DNMT1<br>EED<br>GLP<br>G9A<br>P300<br>EZH2<br>JARID2<br>KDM3B<br>MBD3<br>MCRS1<br>MLL2<br>RING1B<br>BRG1<br>SNF2H<br>HP1<br>TAF1<br>TET1<br>THAP11<br>WDR5<br>YY1<br>PRMT1 | Epigenetic<br>Regulator | HPAT1<br>HPAT2<br>HPAT3<br>HPAT4<br>HPAT5<br>HPAT6<br>HPAT7<br>HPAT8<br>HPAT9<br>HPAT10<br>HPAT12<br>HPAT14<br>HPAT15<br>HPAT16<br>HPAT17<br>HPAT18<br>HPAT19<br>HPAT20<br>HPAT21<br>HPAT22<br>HPAT23 | Novel TE-<br>derived<br>lincRNAs** |
| CD13<br>COL1A1<br>PDGFRB<br>CD90<br>VIM                                             | Fibroblast<br>Marker                   | CDH1<br>CDKN2A<br>GRB2<br>LEFTY2<br>LMNB1<br>MAPK1<br>MAPK3<br>P53                     | Differentiation<br>Pathways         |                                                                                                                                                                                            |                         |                                                                                                                                                                                                       |                                    |
| BUB1<br>CDC20<br>CDKN1A<br>LATS2<br>MAD2L1<br>RBL1                                  | Pluripotent<br>Cell Cycle<br>Regulator | CDX2<br>EpCAM<br>TROP2<br>KRT7<br>TEAD4                                                | Trophectoderm <sup>†</sup>          |                                                                                                                                                                                            |                         |                                                                                                                                                                                                       |                                    |

**Supplementary Table 2. Assays that passed quality tests and used for single-cell gene expression analysis.** Genes were selected based on literature data and to aid to examine putative functions of novel genes related to pluripotency establishment and/or maintenance. \*Assays designed in order to exclusively detect exogenous transcripts used during iPSC derivation. \*\*Assays are the 21 most abundant expressed previously identified<sup>19</sup>. † Assays used for single-cell analysis in human embryos.

### Supplementary Table 3 - Bi-cluster and correlation analysis on single cells during reprogramming

| Bicluster method by Cheng <i>et al.</i> (2000) | Genes                                                                                                                                                                                                                                                            | # of cells |
|------------------------------------------------|------------------------------------------------------------------------------------------------------------------------------------------------------------------------------------------------------------------------------------------------------------------|------------|
| Bicluster C1 (43 x 96)                         | BPTF, CBX7, CD90, CDKN1A, DNMT1, EED, G9A, GLP, GRB2, HP1, HPAT1, HPAT6-8, HPAT10, HPAT12, HPAT14-15, HPAT17-18, HPAT21-23, JARID2, KDM3B, LATS2, MAD2L1, MAPK1, MCERS1, MLL2, NANOG, NPM1, P300, P53, PDGFRB, SALL4, SNF2H, TAF1, TDGF1, TERT, VIM, WDR5, ZFP42 | 96         |
| Bicluster C2 (13 x 48)                         | BRG1, BUB1, CDC20, CDKN2A, EZH1, <b>HPAT5</b> , LEFTY2, LMBN1, MBD3, RBL1, TET1, THAP11, UTF1                                                                                                                                                                    | 48         |
| Bicluster C3 (7 x 33)                          | CD13, COLA1A, <b>HPAT2</b> , HPAT4, HPAT9, LIN28A, POU5F1                                                                                                                                                                                                        | 33         |
| Bicluster C4 (5 x 87)                          | CDH1, DNMT3B, <b>HPAT3</b> , MAPK3, SOX2                                                                                                                                                                                                                         | 87         |

  

| Bicluster method by Murali <i>et al.</i> (2003) | Genes                                                                                                                            | # of cells |
|-------------------------------------------------|----------------------------------------------------------------------------------------------------------------------------------|------------|
| Bicluster X1 (18 x 242)                         | CBX7, HPAT1, HPAT4, HPAT6, HPAT7, HPAT8, HPAT9, HPAT10, HPAT12, HPAT14, HPAT15, HPAT17, HPAT18, HPAT22, HPAT23, P53, TERT, ZFP42 | 242        |
| Bicluster X2 (4 x 178)                          | MAD2L1, MAPK1, RBL1, UTF1                                                                                                        | 178        |
| Bicluster X3 (5 x 104)                          | CDH1, DNMT3B, <b>HPAT3</b> , <b>HPAT5</b> , HPAT21                                                                               | 104        |
| Bicluster X4 (4 x 78)                           | <b>HPAT2</b> , NANOG, POU5F1, SALL4                                                                                              | 78         |
| Bicluster X5 (4 x 75)                           | CD13, CDKN1A, COL1A1, EED                                                                                                        | 75         |
| Bicluster X6 (3 x 82)                           | BRG1, GRB2, SNF2H                                                                                                                | 82         |
| Bicluster X7 (2 x 88)                           | HP1, WDR5                                                                                                                        | 88         |
| Bicluster X8 (2 x 76)                           | CD90, PDGFRB                                                                                                                     | 76         |
| Bicluster X9 (2 x 72)                           | MLL2, P300                                                                                                                       | 72         |
| Bicluster X10 (2 x 71)                          | LMBN1, MCERS1                                                                                                                    | 71         |
| Bicluster X11 (2 x 71)                          | BUB1, EZH2                                                                                                                       | 71         |
| Bicluster X12 (2 x 69)                          | LIN28A, NPM1                                                                                                                     | 69         |
| Bicluster X13 (2 x 69)                          | BPTF, TET1                                                                                                                       | 69         |
| Bicluster X14 (2 x 61)                          | DNMT1, GLP                                                                                                                       | 61         |
| Bicluster X15 (2 x 56)                          | TAF1, THPA11                                                                                                                     | 56         |
| Bicluster X16 (2 x 56)                          | CDC20, G9A                                                                                                                       | 56         |

**Supplementary Table 3-1. Bi-cluster analysis with CC and Xmotif method on single-cells.** Two methods are described by Cheng *et al.*<sup>57</sup> and Murali *et al.*<sup>58</sup>, respectively. Number of bi-clusters (first column) and their respective collection of genes (second column) and number of cells (third column). Novel genes HPAT2, 3, and 5, highlighted in orange, are found in bi-clusters correlated to key pluripotency markers.

| Fibroblast |        |                                   |  |
|------------|--------|-----------------------------------|--|
| Gene 1     | Gene 2 | Pearson cor. Coef. R <sup>2</sup> |  |
| CD13       | PDGFRB | 0.7244301                         |  |
| CDKN2A     | LEFTY2 | 0.7206901                         |  |
| DNMT1      | WDR5   | 0.7192214                         |  |
| VIM        | SNF2H  | 0.7161610                         |  |
| PDGFRB     | CD90   | 0.6758941                         |  |
| BUB1       | CDC20  | 0.6609234                         |  |
| BUB1       | LMBN1  | 0.6589819                         |  |
| MAD2L1     | LMBN1  | 0.6563781                         |  |
| NANOG      | TDGF1  | 0.6545420                         |  |
| BUB1       | MAD2L1 | 0.6498815                         |  |
| SNF2H      | GRB2   | 0.6392659                         |  |
| COL1A1     | UTF1   | 0.6242778                         |  |
| GRB2       | MAPK1  | 0.6165660                         |  |
| CD13       | COL1A1 | 0.6118486                         |  |
| VIM        | GRB2   | 0.6112345                         |  |

  

| Day 2  |        |                                   |  |
|--------|--------|-----------------------------------|--|
| Gene 1 | Gene 2 | Pearson cor. Coef. R <sup>2</sup> |  |
| GRB2   | NPM1   | 0.7715967                         |  |
| VIM    | NPM1   | 0.7477494                         |  |
| CD90   | DNMT1  | 0.7264469                         |  |
| MBD3   | NPM1   | 0.7262332                         |  |
| CD13   | VIM    | 0.7181578                         |  |
| BUB1   | LMBN1  | 0.7110734                         |  |
| VIM    | WDR5   | 0.7108301                         |  |
| LIN28A | SOX2   | 0.7063501                         |  |
| MBD3   | SNF2H  | 0.7032002                         |  |
| SNF2H  | NPM1   | 0.6956402                         |  |
| VIM    | DNMT1  | 0.6793156                         |  |

|        |        |           |  |
|--------|--------|-----------|--|
| EZH2   | RBL1   | 0.6708873 |  |
| COL1A1 | PDGFRB | 0.6670295 |  |
| SNF2H  | GRB2   | 0.6662780 |  |
| BRG1   | NPM1   | 0.6581776 |  |

Day 5

| Gene 1 | Gene 2 | Pearson cor. coef. R <sup>2</sup> |  |
|--------|--------|-----------------------------------|--|
| LIN28A | SOX2   | 0.9535118                         |  |
| BPTF   | P300   | 0.8615977                         |  |
| CD90   | P300   | 0.8471875                         |  |
| BPTF   | JARID2 | 0.8333670                         |  |
| CD13   | PDGFRB | 0.8260145                         |  |
| TAF1   | CDKN2A | 0.8194652                         |  |
| GRB2   | NPM1   | 0.8088202                         |  |
| CD90   | BPTF   | 0.8003200                         |  |
| PDGFRB | BPTF   | 0.7912487                         |  |
| P300   | JARID2 | 0.7670918                         |  |
| P300   | MLL2   | 0.7628003                         |  |
| VIM    | BPTF   | 0.7594642                         |  |
| SNF2H  | NPM1   | 0.7588008                         |  |
| CDKN2A | LEFTY2 | 0.7530967                         |  |
| G9A    | KDM3B  | 0.7528663                         |  |

Day 7

| Gene 1 | Gene 2 | Pearson cor. coef. R <sup>2</sup> |  |
|--------|--------|-----------------------------------|--|
| HPAT12 | HPAT17 | 0.9390666                         |  |
| SOX2   | POU5F1 | 0.9104285                         |  |
| LIN28A | POU5F1 | 0.8665226                         |  |
| HPAT12 | HPAT4  | 0.7564206                         |  |
| MAD2L1 | HPAT12 | -0.7285055                        |  |
| HPAT4  | HPAT17 | 0.7028677                         |  |
| MAD2L1 | NPM1   | 0.7017917                         |  |
| MAD2L1 | HPAT4  | -0.6962021                        |  |
| CD13   | PDGFRB | 0.6899112                         |  |
| NANOG  | UTF1   | 0.6736726                         |  |
| VIM    | P300   | 0.6410589                         |  |
| BRG1   | THAP11 | 0.6333262                         |  |
| COL1A1 | PDGFRB | 0.6072682                         |  |
| BPTF   | P300   | 0.6015609                         |  |
| SNF2H  | NPM1   | 0.5990415                         |  |

Day 10

| Gene 1 | Gene 2 | Pearson cor. coef. R <sup>2</sup> | References                                                                                                                                                                                               |
|--------|--------|-----------------------------------|----------------------------------------------------------------------------------------------------------------------------------------------------------------------------------------------------------|
| SOX2   | POUF51 | 0.9652009                         | Rizzino (2013) <sup>59</sup> , Fong <i>et al.</i> (2011) <sup>60</sup> , Chew <i>et al.</i> (2005) <sup>61</sup> , Wang <i>et al.</i> (2012) <sup>62</sup> , Chambers <i>et al.</i> (2009) <sup>63</sup> |
| HPAT23 | HPAT14 | 0.8416919                         | Novel                                                                                                                                                                                                    |
| THAP11 | CDKN2A | 0.6589637                         | Novel                                                                                                                                                                                                    |
| HPAT6  | HPAT14 | 0.6489457                         | Novel                                                                                                                                                                                                    |
| P300   | MLL2   | 0.6221004                         | Jiang <i>et al.</i> (2013) <sup>64</sup>                                                                                                                                                                 |
| TDGF1  | CDH1   | 0.6203397                         | Novel                                                                                                                                                                                                    |
| CDKN2A | LEFTY2 | 0.6125083                         | Kim <i>et al.</i> (2014) <sup>65,*</sup>                                                                                                                                                                 |
| NANOG  | CDC20  | 0.6118823                         | Novel                                                                                                                                                                                                    |
| THAP11 | GRB2   | 0.6087451                         | Novel                                                                                                                                                                                                    |
| DNMT1  | EED    | 0.6057788                         | Jin <i>et al.</i> (2009) <sup>66,*</sup>                                                                                                                                                                 |
| EED    | THAP11 | 0.6048661                         | Dejosez <i>et al.</i> (2008) <sup>67,*</sup>                                                                                                                                                             |
| DNMT1  | CDKN2A | 0.6024900                         | Robert <i>et al.</i> (2002) <sup>68</sup>                                                                                                                                                                |
| GRB2   | NPM1   | 0.6013000                         | Zhao <i>et al.</i> (2013) <sup>69</sup> , Fujimoto <i>et al.</i> (1996) <sup>70</sup>                                                                                                                    |
| NANOG  | EED    | 0.6010966                         | Denholtz <i>et al.</i> (2013) <sup>71</sup> , Villasante <i>et al.</i> (2011) <sup>72</sup>                                                                                                              |
| HPAT6  | HPAT23 | 0.5551024                         | Novel                                                                                                                                                                                                    |

Day 12

| Gene 1 | Gene 2 | Pearson cor. coef. R <sup>2</sup> | References                                                                                                                                                                                               |
|--------|--------|-----------------------------------|----------------------------------------------------------------------------------------------------------------------------------------------------------------------------------------------------------|
| PDGFRB | CD90   | 0.8149248                         | Hewitt <i>et al.</i> (2012) <sup>73</sup>                                                                                                                                                                |
| LIN28A | POU5F1 | 0.7726876                         | Yu <i>et al.</i> (2007) <sup>74</sup> , Qiu <i>et al.</i> (2010) <sup>75</sup>                                                                                                                           |
| LIN28A | SOX2   | 0.7512026                         | Qiu <i>et al.</i> (2010) <sup>74</sup> , Cimadamore <i>et al.</i> (2013) <sup>76</sup>                                                                                                                   |
| SOX2   | POU5F1 | 0.7510157                         | Rizzino (2013) <sup>59</sup> , Fong <i>et al.</i> (2011) <sup>60</sup> , Chew <i>et al.</i> (2005) <sup>61</sup> , Wang <i>et al.</i> (2012) <sup>62</sup> , Chambers <i>et al.</i> (2009) <sup>63</sup> |
| COL1A1 | PDGFRB | 0.6942359                         | Takahira <i>et al.</i> (2007) <sup>77</sup> , Hewitt <i>et al.</i> (2011) <sup>78</sup>                                                                                                                  |
| COL1A1 | CD90   | 0.6309951                         | Hewitt <i>et al.</i> (2012) <sup>73</sup>                                                                                                                                                                |
| UTF1   | THAP11 | 0.6214731                         | Novel                                                                                                                                                                                                    |
| CD90   | VIM    | 0.6047015                         | Hewitt <i>et al.</i> (2012) <sup>73</sup>                                                                                                                                                                |
| BPTF   | JARID2 | 0.5917150                         | Landry <i>et al.</i> (2008) <sup>79,*</sup> , Gaspar-Maia <i>et al.</i> (2011) <sup>80,*</sup>                                                                                                           |
| CDKN2A | LEFTY2 | 0.5746193                         | Kim <i>et al.</i> (2014) <sup>65,*</sup>                                                                                                                                                                 |
| VIM    | SNF2H  | 0.5745164                         | Gaspar-Maia <i>et al.</i> (2011) <sup>80,*</sup>                                                                                                                                                         |
| CD90   | SNF2H  | 0.5614012                         | Gaspar-Maia <i>et al.</i> (2011) <sup>80,*</sup>                                                                                                                                                         |
| CD13   | PDGFRB | 0.5598867                         | Hewitt <i>et al.</i> (2011) <sup>78</sup>                                                                                                                                                                |
| TDGF1  | TET1   | 0.5589469                         | Novel                                                                                                                                                                                                    |
| NANOG  | SNF2H  | 0.5288758                         | Gaspar-Maia <i>et al.</i> (2011) <sup>80,*</sup>                                                                                                                                                         |

iPSCs

| Gene 1 | Gene 2 | Pearson cor. coef. R <sup>2</sup> | References                                                                                                                     |
|--------|--------|-----------------------------------|--------------------------------------------------------------------------------------------------------------------------------|
| HPAT2  | HPAT3  | 0.8851197                         | Novel                                                                                                                          |
| DNMT3B | JARID2 | 0.8550930                         | Assou <i>et al.</i> (2009) <sup>81</sup> , Pasini <i>et al.</i> (2010) <sup>82</sup> , Peng <i>et al.</i> (2009) <sup>83</sup> |
| TDGF1  | SALL4  | 0.8530899                         | Kidder <i>et al.</i> (2008) <sup>84</sup>                                                                                      |
| SALL4  | GRB2   | 0.8383334                         | Hamazaki <i>et al.</i> (2006) <sup>85</sup> , Lanner <i>et al.</i> (2010) <sup>86</sup>                                        |
| SALL4  | SNF2H  | 0.8313401                         | Kuijk <i>et al.</i> (2011) <sup>87</sup>                                                                                       |
| SALL4  | P300   | 0.8312009                         | Chitilian <i>et al.</i> (2014) <sup>88</sup> , Zhong <i>et al.</i> (2009) <sup>89</sup>                                        |
| WDR5   | GRB2   | 0.8280270                         | Ang <i>et al.</i> (2011) <sup>90</sup> , Yang <i>et al.</i> (2014) <sup>91,†</sup> , Lanner <i>et al.</i> (2010) <sup>86</sup> |
| TDGF1  | DNMT1  | 0.8266580                         | Vassena <i>et al.</i> (2011) <sup>92</sup> , Hochedlinger <i>et al.</i> (2009) <sup>93</sup>                                   |
| SOX2   | SALL4  | 0.8266580                         | Tanimura <i>et al.</i> (2013) <sup>94</sup> , Yang <i>et al.</i> (2008) <sup>95</sup>                                          |
| DNMT3B | SALL4  | 0.8210343                         | Yang <i>et al.</i> (2012) <sup>96</sup> , Tan <i>et al.</i> (2012) <sup>97</sup>                                               |
| SNF2H  | GRB2   | 0.8208503                         | Kuijk <i>et al.</i> (2011) <sup>87</sup>                                                                                       |
| SALL4  | G9A    | 0.8198704                         | Kuijk <i>et al.</i> (2011) <sup>87</sup>                                                                                       |
| GRB2   | NPM1   | 0.8194229                         | Johansson <i>et al.</i> (2010) <sup>98,*</sup>                                                                                 |
| TDGF1  | GRB2   | 0.8184948                         | Kuijk <i>et al.</i> (2011) <sup>87</sup>                                                                                       |
| NANOG  | POU5F1 | 0.8141164                         | Loh <i>et al.</i> (2006) <sup>29</sup> , Wang <i>et al.</i> (2012) <sup>62</sup>                                               |

All 578 cells

| Gene 1 | Gene 2 | Pearson cor. coef. R <sup>2</sup> | References                                                                             |
|--------|--------|-----------------------------------|----------------------------------------------------------------------------------------|
| DNMT3B | HPAT3  | 0.9168379                         | Novel                                                                                  |
| DNMT3B | HPAT5  | 0.8865738                         | Novel                                                                                  |
| TDGF1  | HPAT3  | 0.8760132                         | Novel                                                                                  |
| VIM    | CDKN1A | 0.8667649                         | Li <i>et al.</i> (2014) <sup>99</sup> , Mergui <i>et al.</i> (2010) <sup>100</sup>     |
| DNMT3B | SALL4  | 0.8661937                         | Yang <i>et al.</i> (2012) <sup>96</sup> , Tan <i>et al.</i> (2012) <sup>97</sup>       |
| SALL4  | HPAT3  | 0.8618967                         | Novel                                                                                  |
| HPAT5  | HPAT3  | 0.8558339                         | Novel                                                                                  |
| P300   | MLL2   | 0.8554477                         | Jiang <i>et al.</i> (2013) <sup>64</sup>                                               |
| HPAT2  | HPAT3  | 0.8403645                         | Novel                                                                                  |
| DNMT3B | TDGF1  | 0.8390348                         | Tan <i>et al.</i> (2013) <sup>97</sup>                                                 |
| CDH1   | HPAT3  | 0.8378528                         | Novel                                                                                  |
| TDGF1  | SALL4  | 0.8301321                         | Kidder <i>et al.</i> (2008) <sup>84</sup> , Vassena <i>et al.</i> (2011) <sup>92</sup> |
| LIN28A | SOX2   | 0.8284545                         | Cimadamore <i>et al.</i> (2012, 2013) <sup>76,101</sup>                                |
| DNTM3B | HPAT2  | 0.8235213                         | Novel                                                                                  |
| DNMT3B | CDH1   | 0.8229433                         | Rahnama <i>et al.</i> (2009) <sup>102</sup> , Kwon <i>et al.</i> (2010) <sup>103</sup> |

**Supplementary Table 3-2. Correlation analysis on single-cell populations.** Top 15 correlated gene pairs (first two columns) for each collected single cell population during nuclear reprogramming and their correlation coefficient (third column). Novel genes HPAT2, 3 and 5, highlighted in orange, are found to be among the top 15 correlated gene pairs late during reprogramming. Fourth column (day 10 and later stage) validates correlation analysis and shows previously reported (in)direct interactions between gene pairs. \* are not directly associating both genes, though suggest putative interactions. † involve reported lincRNAs.

### Supplementary Table 4 – Target-specific siRNA sequences

| Target transcript | Sense siRNA sequence                                                                          |
|-------------------|-----------------------------------------------------------------------------------------------|
| HPAT2             | CCGAGAUUCUCGCGUUAUU<br>UCCCAAGGUCAUACCGCAUU<br>CAUCACGGACGCCGAGCUUUU<br>GGAGGCAGGAGGAUCGCUUUU |
| HPAT3             | GAAUUUGGUGCCGUGACUUU<br>GAGAAAGAUCCACCUACGAUU                                                 |
| HPAT5             | UAACAUAACCCAGGAGUAUU<br>GAGAAAGGGAGCCCGAAUU<br>CAGGAAGACGCCAGCGGAUU                           |

Supplementary Table 4. Target-specific siRNA sequences used for knockdown experiments.

Supplementary Table 5 – refer to Excel file – ChIP analysis with NANOG

Supplementary Table 6 – refer to Excel file – Protein microarray analysis

Supplementary Table 7 – refer to Excel file – Prediction of miRNA binding sites

Supplementary Table 8 – refer to Excel file – Microarray and cWords analysis

## Supplementary Note

### **Bi-cluster analysis on single cells**

In an effort to retrieve subgroups within each cell population, we applied bi-cluster analysis on our high dimensional dataset. Bi-cluster analysis resolves local rather than global gene association patterns and identifies gene sets with related expression motifs across subsets of cells<sup>104</sup>. We explored 3 different algorithms (Methods section for detail) for bi-cluster identification, as existing methods are extremely sensitive to parameter and data variation, thus constituting a challenge to rely solely on one method. The Plaid method defined by Lazzeroni and Owen<sup>52</sup> assembled the data into five clusters (P1-P5) (Fig. 2d); the algorithm by Cheng and Church<sup>57</sup> identified four clusters (C1-C4, Supplementary Fig. 4j, Supplementary Table 3) and the Xmotifs algorithm<sup>58</sup>, generated 16 clusters (X1-X16, Supplementary Fig. 4j, Supplementary Table 3). The latter searches for genes with constant values over a set of different single cells, thus revealing “conserved gene expression motifs”. We found that *HPAT2*, *HPAT3* and *HPAT5* were identified in all three algorithms with expression patterns highly correlative to key pluripotency markers including *SALL4*, *POU5F1*, *SOX2*, *DNMT3B* and *NANOG*. For instance, cluster X3 and X4 consisted of 104 and 78 cells, respectively, and correlated *HPAT3/HPAT5* with *CDH1/DNMT3B* and *HPAT2* with *SALL4/POU5F1/NANOG*, respectively. Cluster P1, P2, P4 and P5 included 111, 81, 94 and 24 cells, respectively, and collectively identified subpopulations that uniquely express *HPAT2*, *HPAT3* and *HPAT5* in a correlative manner to above mentioned key pluripotency markers, including *SALL4*. As internal validation, 83 cells grouped in cluster P3 were of fibroblast origin as they expressed fibroblast specific marker genes including *CD13*, *COL1A1*, *VIM* and *PDGFRB*.

### **Correlation analysis on single cells**

We then reasoned that single-cell expression data could be used to identify pairs of genes with correlated expression and reveal regulatory linkages, as recently shown<sup>25</sup>. Correlation analysis across all 578 cells revealed one group of genes (C1), that included five positively correlated

genes (*CD13*, *CD90*, *COL1A1*, *VIM* and *PDGFRB*) consistent with previous reports<sup>73</sup> (Fig. 2d). C2, a second group included *POU5F1*, *SOX2* and *LIN28A*, known to be crucial for pluripotency establishment and maintenance<sup>59,63</sup>; *NANOG* and *TET1*, crucial for pluripotency establishment and shown to physically interact with each other<sup>105</sup> positively correlated in group C3. In contrast, negative correlation was observed between *POU5F1/SOX2/LIN28A* (that maintain self-renewal and pluripotency in ESCs/iPSCs) and *MAPK3* (C4), which upon activation, triggers differentiation<sup>86,106</sup>. Most interestingly, the majority of novel lincRNAs including *HPAT2*, *HPAT3*, and *HPAT5* correlated positively with each other (group C5) and negatively with fibroblast specific markers (group C6) suggesting a common role during reprogramming. We located *SALL4*, *CDH1* and *DNMT3B* within that same group validating our bi-cluster analysis. Among the top 15 most correlated gene pairs, *HPAT3* correlated with *DNMT3B*, *TDGF1*, *SALL4*, *HPAT5*, *HPAT2* and *CDH1* (Supplementary Table 3) at late stages during reprogramming, indicating coordinated expression and a central role of this particular novel transcript. See Supplementary Table 3 for top 15 correlated gene pairs for different time points of single-cell collection. Correlations that were found late during reprogramming (day 10 – iPSCs) were consistent with previous reports (references in fourth column).

### **Protein microarray assays**

Protein microarrays are chips containing more than 9,400 human recombinant proteins spotted in duplicate. *HPAT-2*, *-3* and *-5* were *in vitro* transcribed (Supplementary Fig. 6a), labeled with Cy5 and independently probed on two human protein microarrays. We included *HPAT-2* and *-3*, both HERV-H-containing lincRNAs, to validate previous findings<sup>17</sup> as well as to identify differences with *HPAT5*. We adopted a previously published protocol<sup>35</sup> for optimal labeling conditions such that 3 pmol dye per  $\mu\text{g}$  RNA with an average efficacy of 1 dye molecule per 850 bp RNA was achieved to minimize modification of native RNA structures while yielding signal intensities that are readily visualized. Each RNA-species was probed in two technical replicates (denatured and non-denatured). By selecting for the most stringent RNA-protein binding events (minimum signal

above background of 2.5 fold, Z-score > 2), 68, 56 and 28 binding events for *HPAT-2*, *-3* and *-5*, respectively were identified (Supplementary Fig. 6c). To further reduce the list of candidate RNA-protein interactions we removed common RNA binding-proteins that contained known RNA binding motifs (Additional Table 1 in Siprashvili *et al.*<sup>35</sup>). Neither known pluripotency-associated proteins nor proteins related to chromatin modification complexes (such as PCR2) were among the remaining list (Supplementary Table 6) which confirms a recent report<sup>17</sup> and possibly explains that no significant binding sites genome wide were found during ChIRP analysis. We then asked whether *HPAT-2* and *-3*, both HERV-H derived lincRNAs, bind to OCT4 and other mediators as previously described. 6 out of 10 proteins that were used in this study were printed onto the protein array (Supplementary Fig. 6d). Notably, *HPAT2* bound to all 6 proteins (OCT4, CDK8, MED6, MED12, MED21 and MED27), validating our approach. *HPAT3* specifically bound to 3 out of 6 proteins including OCT4. This is in contrast to *HPAT5*, a non-HERVH derived lincRNA, that only bound to 1 out of 6 (CDK8) proteins, underlining that it represents a different class of lincRNA. Taken together our findings confirm previously published results, represent a large resource to study specific *HPAT*-protein interactions and suggest that each retroviral-derived lincRNA is likely to be implicated in numerous physiological pathways and belong to many phenotypic classes not necessarily related to pluripotency maintenance<sup>20</sup>. Moreover our data indicate that *HPAT5* that bound to the fewest number of proteins, of which most were common RNA binders, is distinct from *HPAT2* and *HPAT3*.

## Supplementary References

- 53 Bengtsson, M., Stahlberg, A., Rorsman, P. & Kubista, M. Gene expression profiling in single cells from the pancreatic islets of Langerhans reveals lognormal distribution of mRNA levels. *Genome Res.* **15**, 1388-1392 (2005).
- 54 Pang, Z. P. *et al.* Induction of human neuronal cells by defined transcription factors. *Nature* **476**, 220-223 (2011).
- 55 Goff, L. A. *et al.* Ago2 immunoprecipitation identifies predicted microRNAs in human embryonic stem cells and neural precursors. *PLoS One* **4**, e7192 (2009).
- 56 Raj, A., van den Bogaard, P., Rifkin, S. A., van Oudenaarden, A. & Tyagi, S. Imaging individual mRNA molecules using multiple singly labeled probes. *Nat Methods* **5**, 877-879 (2008).
- 57 Cheng, Y. & Church, G. M. Biclustering of expression data. *Proc Int Conf Intell Syst Mol Biol* **8**, 93-103 (2000).
- 58 Murali, T. M. & Kasif, S. Extracting conserved gene expression motifs from gene expression data. *Pac Symp Biocomput*, 77-88 (2003).
- 59 Rizzino, A. Concise review: The Sox2-Oct4 connection: critical players in a much larger interdependent network integrated at multiple levels. *Stem Cells* **31**, 1033-1039 (2013).
- 60 Fong, Y. W. *et al.* A DNA repair complex functions as an Oct4/Sox2 coactivator in embryonic stem cells. *Cell* **147**, 120-131 (2011).
- 61 Chew, J. L. *et al.* Reciprocal transcriptional regulation of Pou5f1 and Sox2 via the Oct4/Sox2 complex in embryonic stem cells. *Mol. Cell. Biol.* **25**, 6031-6046 (2005).
- 62 Wang, Z., Oron, E., Nelson, B., Razis, S. & Ivanova, N. Distinct lineage specification roles for NANOG, OCT4, and SOX2 in human embryonic stem cells. *Cell Stem Cell* **10**, 440-454 (2012).
- 63 Chambers, I. & Tomlinson, S. R. The transcriptional foundation of pluripotency. *Development* **136**, 2311-2322 (2009).
- 64 Jiang, H. *et al.* Regulation of transcription by the MLL2 complex and MLL complex-associated AKAP95. *Nat. Struct. Mol. Biol.* **20**, 1156-1163 (2013).
- 65 Kim, D. K., Cha, Y., Ahn, H. J., Kim, G. & Park, K. S. Lefty1 and lefty2 control the balance between self-renewal and pluripotent differentiation of mouse embryonic stem cells. *Stem Cells Dev* **23**, 457-466 (2014).
- 66 Jin, B. *et al.* DNMT1 and DNMT3B modulate distinct polycomb-mediated histone modifications in colon cancer. *Cancer Res.* **69**, 7412-7421 (2009).
- 67 Dejosez, M. *et al.* Ronin is essential for embryogenesis and the pluripotency of mouse embryonic stem cells. *Cell* **133**, 1162-1174 (2008).
- 68 Robert, M. F. *et al.* DNMT1 is required to maintain CpG methylation and aberrant gene silencing in human cancer cells. *Nat. Genet.* **33**, 61-65 (2003).
- 69 Zhao, H. *et al.* Novel modeling of cancer cell signaling pathways enables systematic drug repositioning for distinct breast cancer metastases. *Cancer Res.* **73**, 6149-6163 (2013).
- 70 Fujimoto, J. *et al.* Characterization of the transforming activity of p80, a hyperphosphorylated protein in a Ki-1 lymphoma cell line with chromosomal translocation t(2;5). *Proc. Natl. Acad. Sci. U. S. A.* **93**, 4181-4186 (1996).
- 71 Denholtz, M. *et al.* Long-range chromatin contacts in embryonic stem cells reveal a role for pluripotency factors and polycomb proteins in genome organization. *Cell Stem Cell* **13**, 602-616 (2013).
- 72 Villasante, A. *et al.* Epigenetic regulation of Nanog expression by Ezh2 in pluripotent stem cells. *Cell Cycle* **10**, 1488-1498 (2011).
- 73 Hewitt, K. J. *et al.* PDGFRbeta expression and function in fibroblasts derived from pluripotent cells is linked to DNA demethylation. *J. Cell Sci.* **125**, 2276-2287 (2012).
- 74 Yu, J. *et al.* Induced pluripotent stem cell lines derived from human somatic cells. *Science* **318**, 1917-1920 (2007).



- 75 Qiu, C., Ma, Y., Wang, J., Peng, S. & Huang, Y. Lin28-mediated post-transcriptional regulation of Oct4 expression in human embryonic stem cells. *Nucleic Acids Res.* **38**, 1240-1248 (2010).
- 76 Cimadamore, F., Amador-Arjona, A., Chen, C., Huang, C. T. & Terskikh, A. V. SOX2-LIN28/let-7 pathway regulates proliferation and neurogenesis in neural precursors. *Proc. Natl. Acad. Sci. U. S. A.* **110**, E3017-3026 (2013).
- 77 Takahira, T. *et al.* Detection of COL1A1-PDGFB fusion transcripts and PDGFB/PDGFRB mRNA expression in dermatofibrosarcoma protuberans. *Mod. Pathol.* **20**, 668-675 (2007).
- 78 Hewitt, K. J. *et al.* Epigenetic and phenotypic profile of fibroblasts derived from induced pluripotent stem cells. *PLoS One* **6**, e17128 (2011).
- 79 Landry, J. *et al.* Essential role of chromatin remodeling protein Bptf in early mouse embryos and embryonic stem cells. *PLoS Genet* **4**, e1000241 (2008).
- 80 Gaspar-Maia, A., Alajem, A., Meshorer, E. & Ramalho-Santos, M. Open chromatin in pluripotency and reprogramming. *Nat. Rev. Mol. Cell Biol.* **12**, 36-47 (2011).
- 81 Assou, S. *et al.* A gene expression signature shared by human mature oocytes and embryonic stem cells. *BMC Genomics* **10**, 10 (2009).
- 82 Pasini, D. *et al.* JARID2 regulates binding of the Polycomb repressive complex 2 to target genes in ES cells. *Nature* **464**, 306-310 (2010).
- 83 Peng, J. C. *et al.* Jarid2/Jumonji coordinates control of PRC2 enzymatic activity and target gene occupancy in pluripotent cells. *Cell* **139**, 1290-1302 (2009).
- 84 Kidder, B. L., Yang, J. & Palmer, S. Stat3 and c-Myc genome-wide promoter occupancy in embryonic stem cells. *PLoS One* **3**, e3932 (2008).
- 85 Hamazaki, T., Kehoe, S. M., Nakano, T. & Terada, N. The Grb2/Mek pathway represses Nanog in murine embryonic stem cells. *Mol. Cell. Biol.* **26**, 7539-7549 (2006).
- 86 Lanner, F. & Rossant, J. The role of FGF/Erk signaling in pluripotent cells. *Development* **137**, 3351-3360 (2010).
- 87 Kuijk, E. W., Chuva de Sousa Lopes, S. M., Geijsen, N., Macklon, N. & Roelen, B. A. The different shades of mammalian pluripotent stem cells. *Hum. Reprod. Update* **17**, 254-271 (2011).
- 88 Chitilian, J. M. *et al.* Critical components of the pluripotency network are targets for the p300/CBP interacting protein (p/CIP) in embryonic stem cells. *Stem Cells* **32**, 204-215 (2014).
- 89 Zhong, X. & Jin, Y. Critical roles of coactivator p300 in mouse embryonic stem cell differentiation and Nanog expression. *J. Biol. Chem.* **284**, 9168-9175 (2009).
- 90 Ang, Y. S. *et al.* Wdr5 mediates self-renewal and reprogramming via the embryonic stem cell core transcriptional network. *Cell* **145**, 183-197 (2011).
- 91 Yang, Y. W. *et al.* Essential role of lncRNA binding for WDR5 maintenance of active chromatin and embryonic stem cell pluripotency. *Elife* **3**, e02046 (2014).
- 92 Vassena, R. *et al.* Waves of early transcriptional activation and pluripotency program initiation during human preimplantation development. *Development* **138**, 3699-3709 (2011).
- 93 Hochedlinger, K. & Plath, K. Epigenetic reprogramming and induced pluripotency. *Development* **136**, 509-523 (2009).
- 94 Tanimura, N., Saito, M., Ebisuya, M., Nishida, E. & Ishikawa, F. Stemness-related factor Sall4 interacts with transcription factors Oct-3/4 and Sox2 and occupies Oct-Sox elements in mouse embryonic stem cells. *J. Biol. Chem.* **288**, 5027-5038 (2013).
- 95 Yang, J. *et al.* Genome-wide analysis reveals Sall4 to be a major regulator of pluripotency in murine-embryonic stem cells. *Proc. Natl. Acad. Sci. U. S. A.* **105**, 19756-19761 (2008).
- 96 Yang, J., Corsello, T. R. & Ma, Y. Stem cell gene SALL4 suppresses transcription through recruitment of DNA methyltransferases. *J. Biol. Chem.* **287**, 1996-2005 (2012).
- 97 Tan, M. H. *et al.* An Oct4-Sall4-Nanog network controls developmental progression in the pre-implantation mouse embryo. *Mol Syst Biol* **9**, 632 (2013).

- 98 Johansson, H. & Simonsson, S. Core transcription factors, Oct4, Sox2 and Nanog, individually form complexes with nucleophosmin (Npm1) to control embryonic stem (ES) cell fate determination. *Aging (Albany NY)* **2**, 815-822 (2010).
- 99 Li, X. L. *et al.* A p21-ZEB1 complex inhibits epithelial-mesenchymal transition through the microRNA 183-96-182 cluster. *Mol. Cell. Biol.* **34**, 533-550 (2014).
- 100 Mergui, X. *et al.* p21Waf1 expression is regulated by nuclear intermediate filament vimentin in neuroblastoma. *BMC Cancer* **10**, 473 (2010).
- 101 Cimadamore, F. *et al.* SOX2 modulates levels of MITF in normal human melanocytes, and melanoma lines in vitro. *Pigment Cell Melanoma Res* **25**, 533-536 (2012).
- 102 Rahnama, F. *et al.* Epigenetic regulation of E-cadherin controls endometrial receptivity. *Endocrinology* **150**, 1466-1472 (2009).
- 103 Kwon, O. *et al.* Modulation of E-cadherin expression by K-Ras; involvement of DNA methyltransferase-3b. *Carcinogenesis* **31**, 1194-1201 (2010).
- 104 Dhillon, I. S. Co-clustering documents and words using bipartite spectral graph partitioning. . In *Proceedings of the seventh ACM SIGKDD international conference on Knowledge discovery and data mining (San Francisco, California: ACM)*, pp. 269-274 (2001).
- 105 Costa, Y. *et al.* NANOG-dependent function of TET1 and TET2 in establishment of pluripotency. *Nature* **495**, 370-374 (2013).
- 106 Kim, M. O. *et al.* ERK1 and ERK2 regulate embryonic stem cell self-renewal through phosphorylation of Klf4. *Nat. Struct. Mol. Biol.* **19**, 283-290 (2012).
